# Supplementary material
Source: PubMed Central journal article supplement (PMC7956058)
Supplement: NIHMS1652680-supplement-1.pdf [file NIHMS1652680-supplement-1.pdf]

## SUPPORTING DOCUMENTS

### EXTRACELLULAR VESICLE ANALYSIS ALLOWS FOR IDENTIFICATION OF INVASIVE IPMN

Katherine S. Yang<sup>1</sup>, Debora Ciprani<sup>2</sup>, Aileen O'Shea<sup>1,4</sup>, Andrew Liss<sup>2</sup>, Robert Yang<sup>1</sup>, Sarah Fletcher-Mercaldo<sup>4</sup>, Mari Mino-Kenudson<sup>3</sup>, Carlos Fernández-del Castillo<sup>2</sup>, Ralph Weissleder<sup>1,4,5,\*</sup>

|                                                                                                           |    |
|-----------------------------------------------------------------------------------------------------------|----|
| Supplementary Methods                                                                                     | 2  |
| Figure S1. Effect of EV isolation on protein measurements                                                 | 4  |
| Figure S2. Characterization of molecular targets on IPMN and PDAC cell lines and their derived EV         | 5  |
| Figure S3. ROC analysis for the different EV biomarkers in the discovery cohort                           | 6  |
| Figure S4. Analysis of 16 prototypical biomarkers in EV from different discovery cohort patient subgroups | 7  |
| Figure S5. Analysis of 16 biomarkers in EV from validation cohort LG and HG-IPMN lesions                  | 8  |
| Figure S6. Biomarkers for the decision to surgically remove HG-IPMN                                       | 9  |
| Figure S7. Value of CA19-9 measurement in IPMN                                                            | 10 |
| Table S1. Experimental details of DEST assay                                                              | 11 |
| Table S2. List of reagents used in the DEST assay                                                         | 12 |
| Table S3. Antibodies used in this study                                                                   | 13 |
| Table S4. DEST antibody pair conditions and controls                                                      | 14 |
| Table S5. Additional antibodies tested, but found to be unsuitable for DEST                               | 15 |
| Table S6. EV biomarker analysis in validation cohort                                                      | 16 |

## Supplementary Methods

### Cell lines

AsPC-1, BxPC-3, MIA PaCa-2, and Capan-2 cell lines were purchased from the American Type Culture Collection (Manassas, VA). AsPC-1 and BxPC-3 cells were cultured in RPMI-1640 medium (Thermo, 11875119). MIA Paca-2 cells were cultured in Dulbecco's modified eagle's medium (Mediatech, 10-013-CV) and Capan-2 were cultured in McCoy's 5a medium (Thermo, 16600108). All media was supplemented with 10% fetal bovine serum (Atlanta Biologicals, S12450), 100 IU penicillin, and 100 µg/mL streptomycin (Mediatech, 30-002-CI). PDAC (1531 and 1617) and IPMN (1505 and 1966) PDX cell lines were from the MGH pancreas biobank. Both PDX cell lines were maintained in a 50:50 mix of Ham's F-12 and Dulbecco's modified eagle's medium. PDAC PDX cells were supplemented as above. IPMN PDX cell lines were supplemented with 20% fetal bovine serum (FBS), 1% antibiotic-antimycotic (Thermo, 15240062), 10 mM Nicotinamide (Sigma-Aldrich, N0636), 1X insulin-transferrin-selenium (Corning, 25-800-CR), 8.4 ng/mL cholera toxin (Sigma-Aldrich, C8052), 10 ng/mL epidermal growth factor (Sigma-Aldrich, E9644), and 10 ng/mL hepatocyte growth factor (Thermo, PHG0324).

### Antibody-bead coupling and biotinylation

Capture antibodies were coupled to Dynabeads M-270 Epoxy magnetic beads using a coupling kit (Thermo, 14311D). *All buffers used in the coupling reaction were provided in the kit (Buffers C1, C2, HB, LB, SB).* Briefly, dynabeads were weighed into Eppendorf tubes and washed once with Buffer C1. Antibody was added to beads at a ratio of 10 µg antibody/mg dynabeads. Buffer C1 was added to the antibody solution for a total volume of 50 µL/mg bead. *The total reaction volume (Buffer C1 + antibody + Buffer C2) was 100µl per mg Dynabeads (manufacturer's instructions, Thermo 14311D).* The bead-antibody mixture was incubated overnight at 37°C on a HulaMixer (35 rpm, 5° tilt, 5° rotation; all 5 sec). The antibody solution was saved to determine

coupling efficiency and beads were then washed with buffer HB and LB (containing 0.05% Tween-20), followed by two washes with buffer SB. Beads were then incubated in buffer SB for 15 min, solution was removed, and the final antibody-bead conjugate was stored at 4°C in 100 µL buffer SB/mg dynabead. After each wash, beads were incubated 1 min on a DynaMag magnet and wash buffer was discarded. Coupling efficiency was typically 20-80%, depending on the capture antibody. Detection antibodies that were not readily available as a biotinylated product, were prepared using sulfo-NHS-LC-Biotin (Thermo, A39257). Briefly, a 20-fold molar excess of biotin was calculated for 50µg antibody. 180µL ultrapure water was added to a 1 mg no-weigh vial of biotin to make a 10 mM stock solution. An appropriate volume of biotin was added to the antibody in PBS and incubated for 30 min at room temperature. Excess biotin was then removed using a 0.5 mL, 7MWCO Zeba column (Thermo, 89882), according to the manufacturers' instructions. Final biotinylated antibody concentrations were determined using a Nanodrop (Thermo, ND-1000).

**Figure S1. Effect of EV isolation on MUC5AC measurements.** Plasma EV were isolated by IZON column separation or direct processing. The direct method (DEST) is a combination of immunobead enrichment, coupled with washing and lowering backgrounds by dual antibody capture (see **Fig. 1**). MUC5AC analysis in EV was done using either IZON column purification (grey bars) or the DEST method in unpurified plasma (red bars). Note the congruence of the methods. We settled on using the direct DEST method as there is no loss of EV, it is fast and does not change the make-up of EV populations.

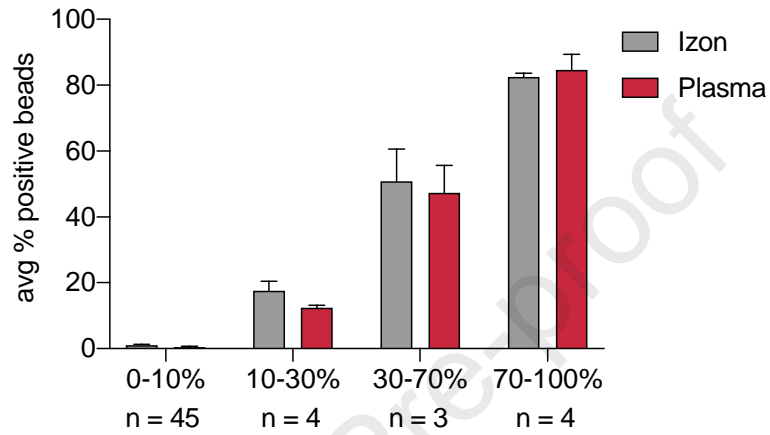

**Figure S2. Characterization of molecular targets on IPMN and PDAC cell lines and their derived EV.** (A) Four PDAC cell lines (AsPC-1, BxPC-3, Capan-2, MIA PaCa-2), two PDAC PDX (PDAC1531, PDAC1617)<sup>1</sup> and two invasive HG-IPMN PDX (HGIPMN 1505, HGIPMN1966) were analyzed for the presence or absence of 16 molecular markers. Controls refer to antibody testing against isolated proteins or known positive EV lysates. (B) DEST analysis of EV fractions obtained from the same cell lines shows presence of certain molecular targets from parental cells. Note that EV targets were only detected when also present in parental cells. Furthermore, MUC5AC was elevated in both HG-IPMN PDX models.

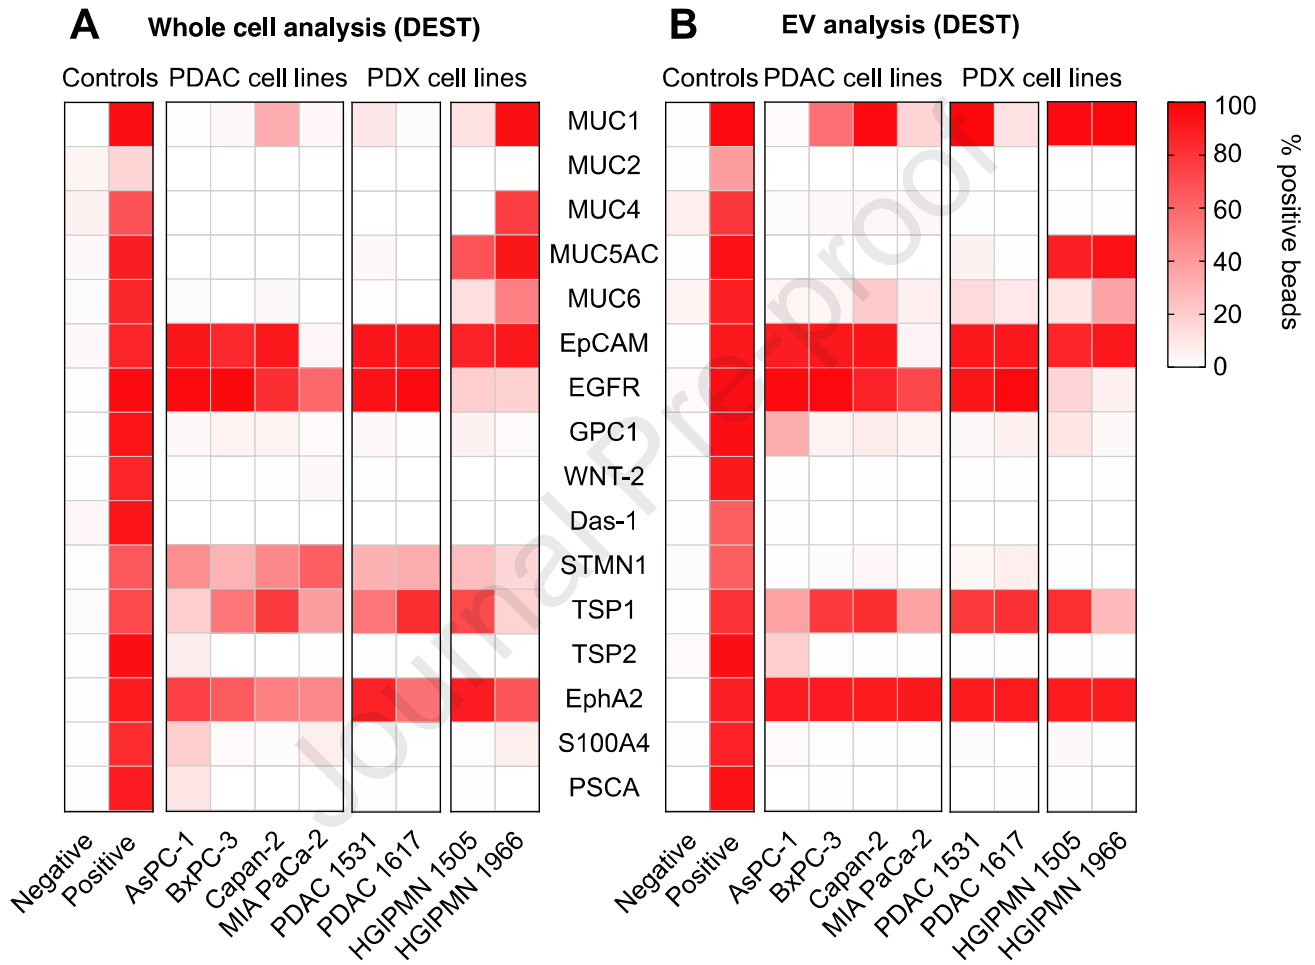

**Figure S3. ROC analysis for the different EV biomarkers in the discovery cohort.** AUC (area under the curve) analysis for LG-IPMN vs HG-IPMN. Note that MUC2, MUC4, GPC1, EpCAM, Das-1, STMN1, and TSP2 are slightly better positive predictors of LG-IPMN. All other markers are positive predictors of HG-IPMN.

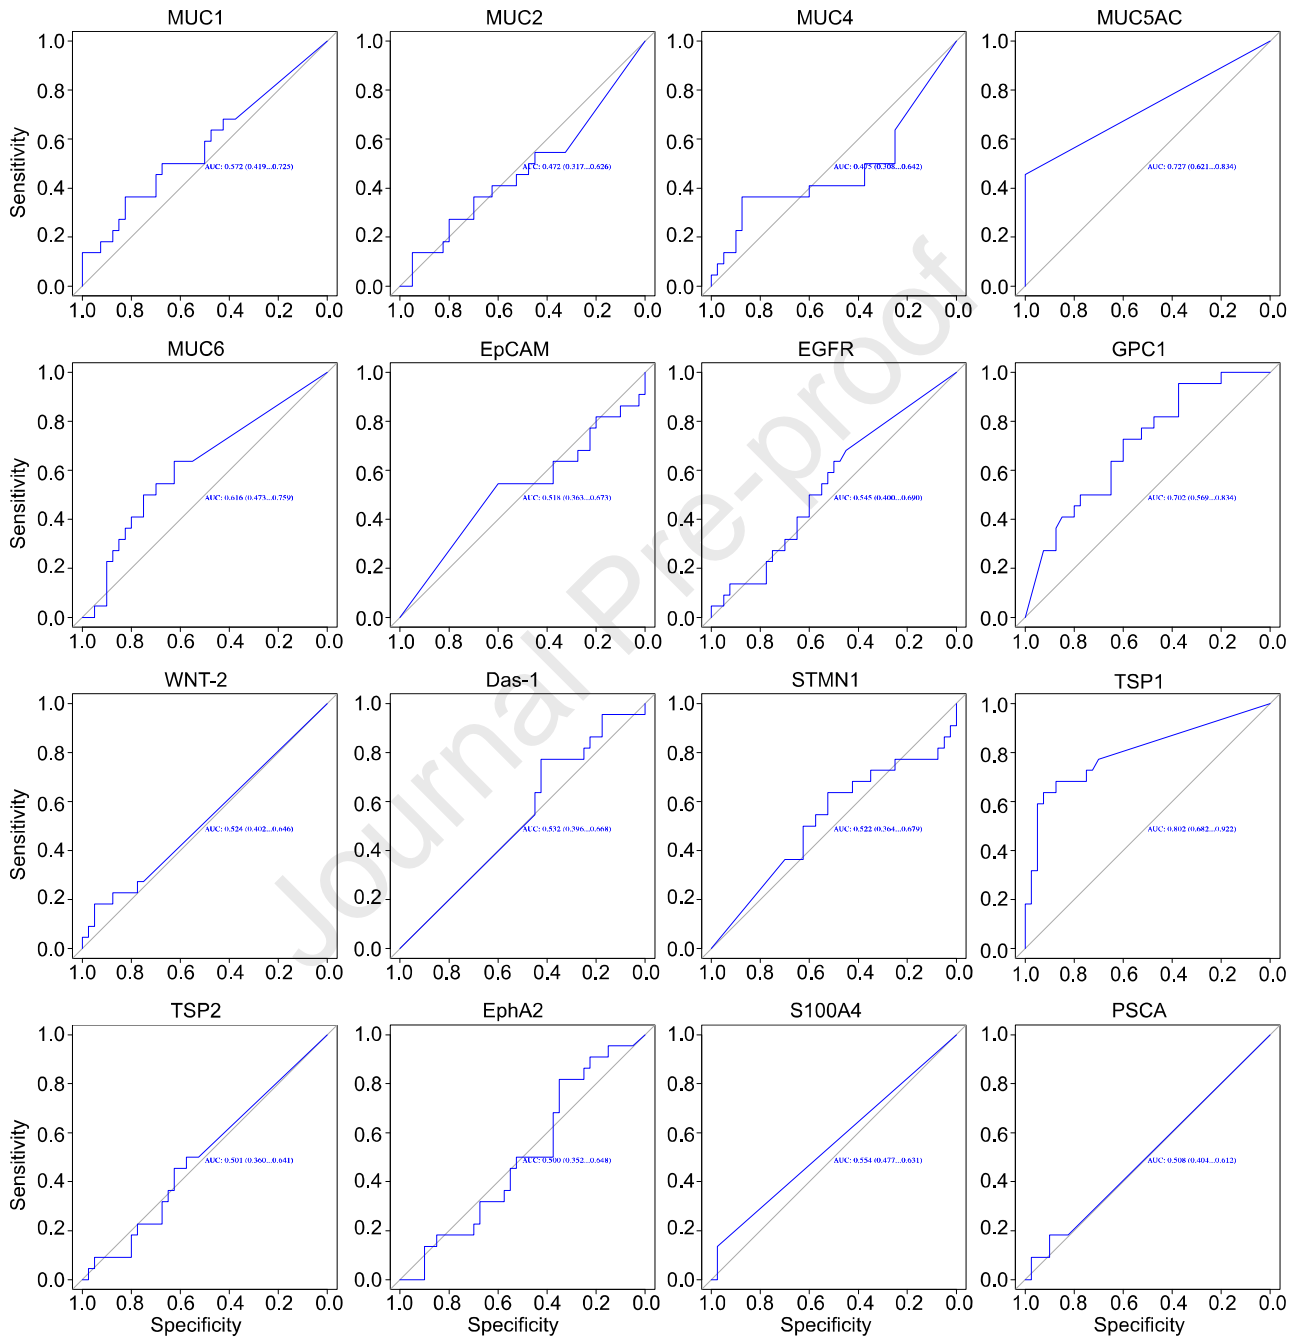

**Figure S4. Analysis of 16 prototypical biomarkers in EV from different discovery cohort patient subgroups.** Each datapoint represents an EV sample from a single patient. Data shown are from healthy controls (light grey dots, n= 10); benign: age-matched control patients undergoing abdominal surgery but without evidence for any pancreatic lesions (dark grey squares, n=14 patients); low grade IPMN (blue triangles, n=40 patients); high grade IPMN (orange triangles, n=11 patients) and invasive high grade IPMN (red diamonds, n=11 patients). See **Table 1** for patient demographics. Differences between HG-IPMN and LG-IPMN are shown by asterisk (\*\*\*\* p < 0.0001, \* p < 0.05, ns = not statistically significant, p > 0.05; Mann-Whitney two-tailed non-parametric test). Error bars represent standard error of the mean. #TSP1 is statistically significant but the extremely low signal over background makes the results clinically unreliable.

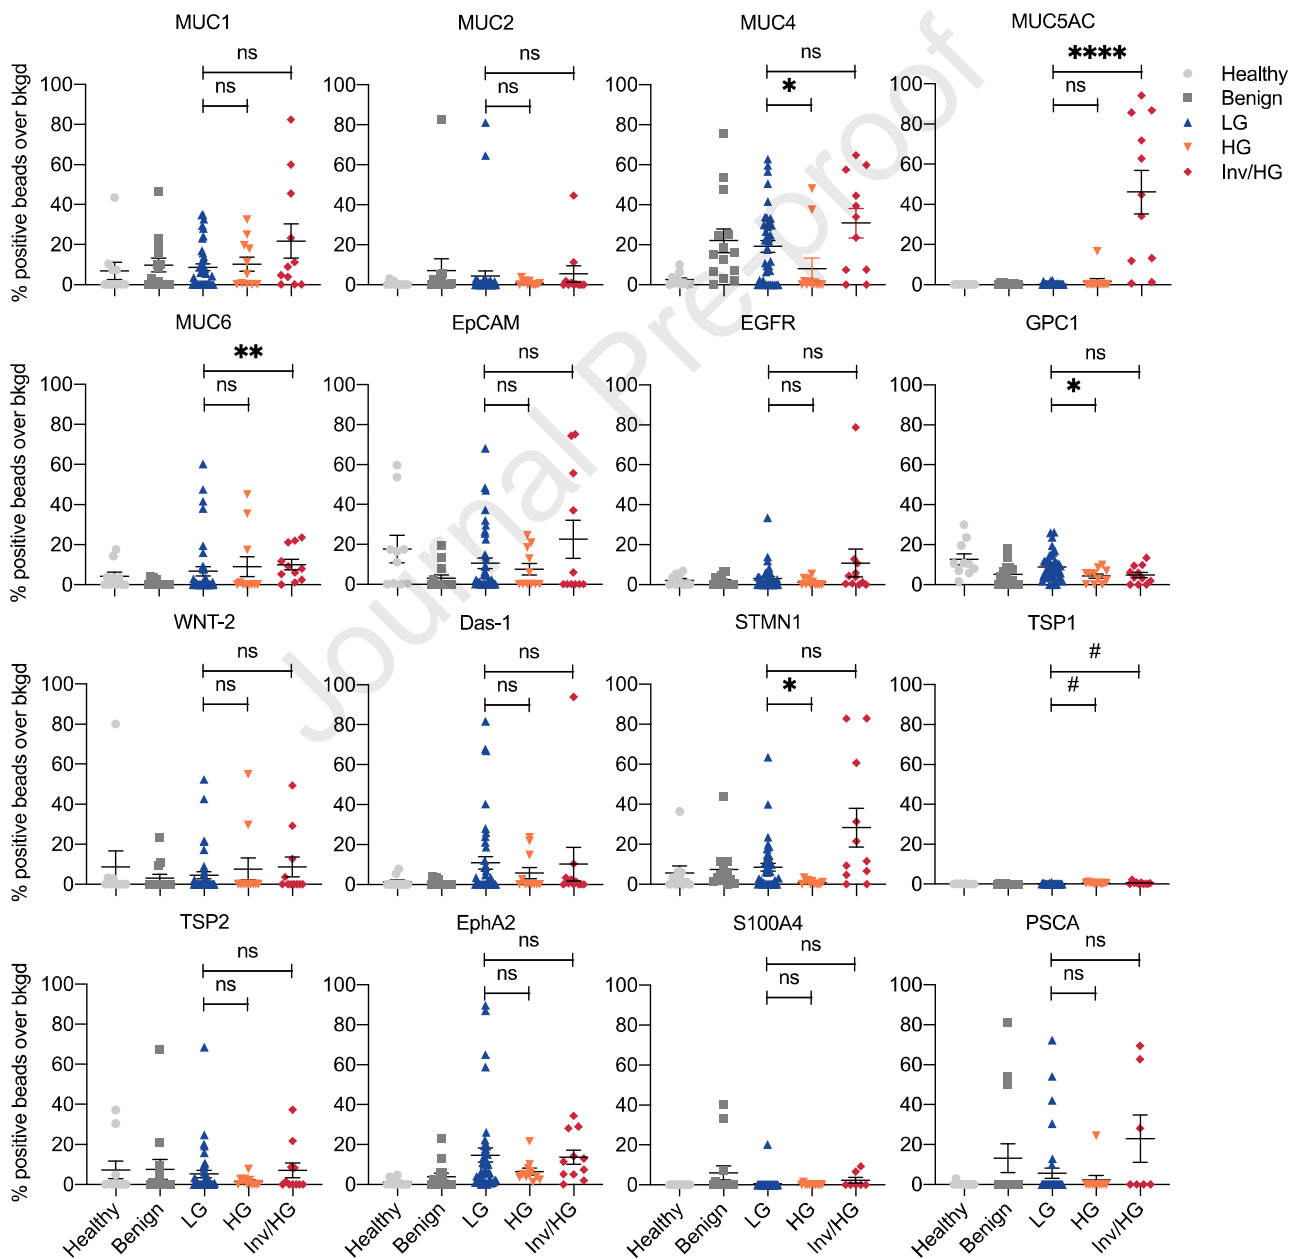

**Figure S5. Analysis of 16 biomarkers in EV from validation cohort LG and HG-IPMN lesions.** Each data point represents an EV sample from a single patient. Data shown are from low grade IPMN (blue circle, n = 35) and high grade IPMN (red circle, n = 12). See **Table 1** for cohort demographics. Differences between HG-IPMN and LG-IPMN are shown by asterisk (\*\*\*\* p < 0.0001; \* p < 0.05; ns = not statistically significant, p > 0.05).

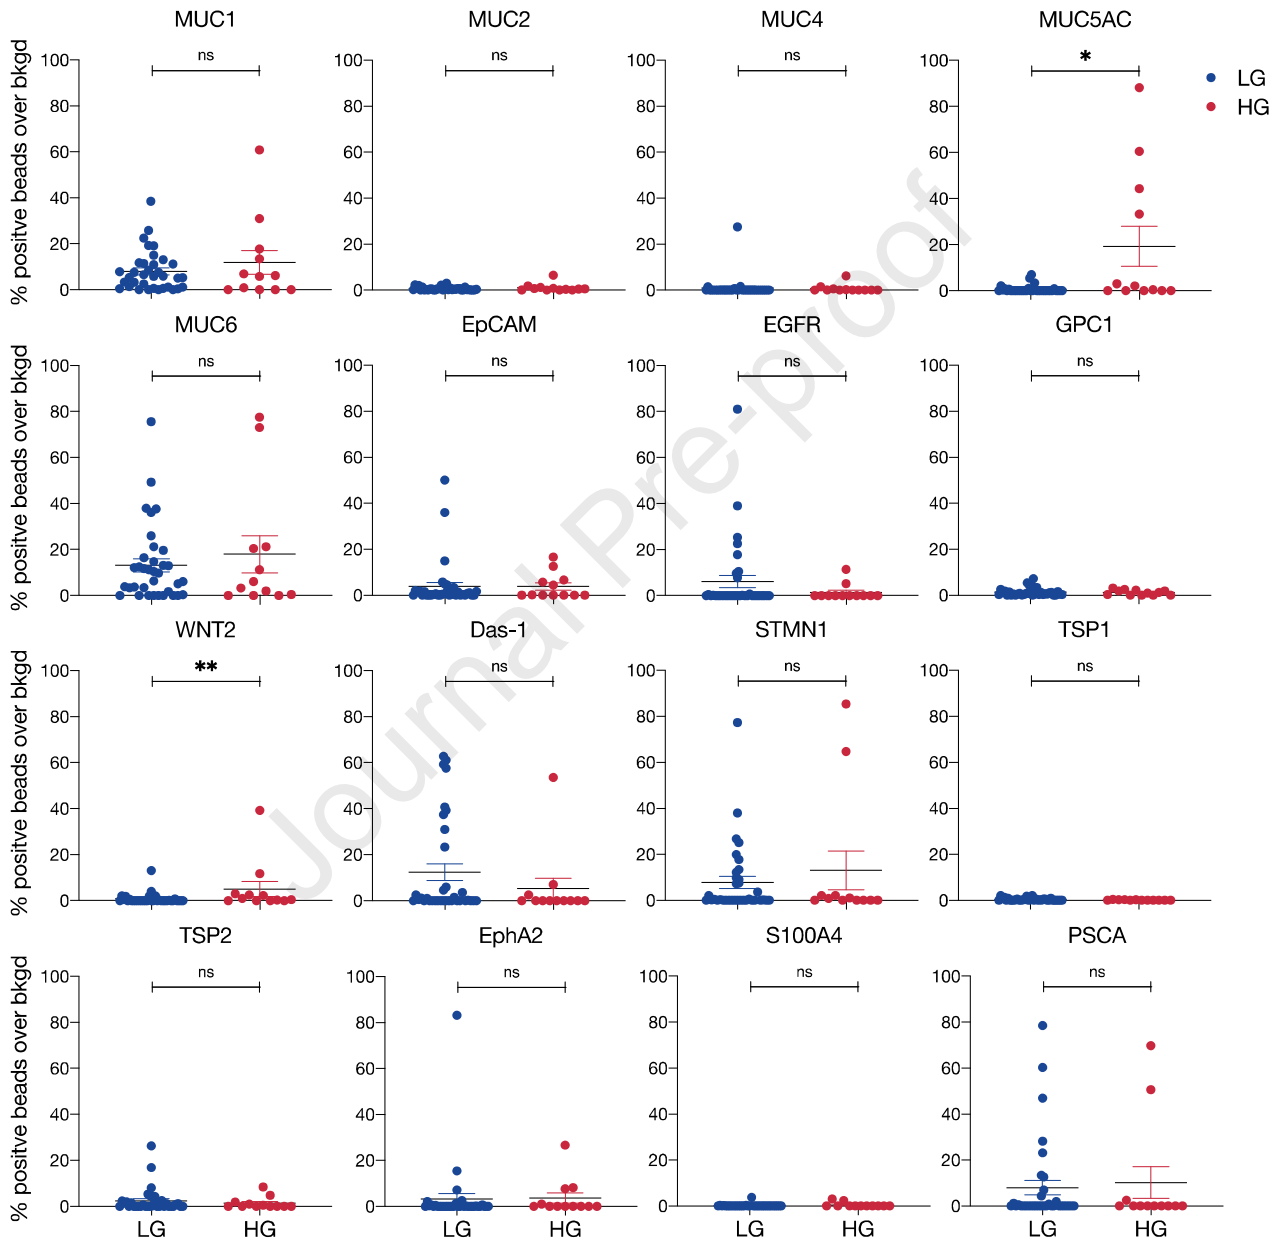



**Figure S6. Biomarkers for the decision to surgically remove HG-IPMN.** In the 14 patients with inv/HG-IPMN traditional imaging and high risk stigmata alone would have missed 5 of the 14 cases requiring surgery (36% miss rate). If MUC5AC EV testing was added, all patients requiring immediate surgery would have been identified correctly.

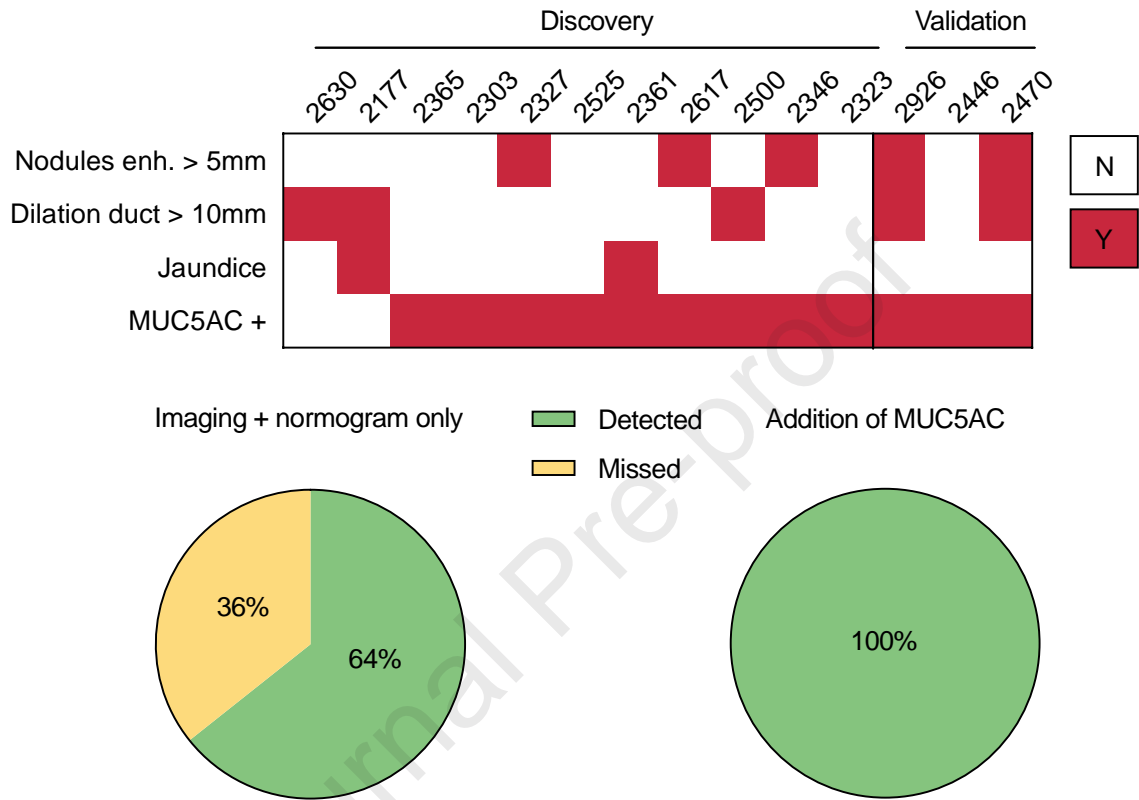

**Figure S7. Value of CA19-9 measurement in IPMN.** Plasma levels of CA19-9 are not statistically different between the different groups and the AUC is 0.6, indicating poor discriminatory capabilities.

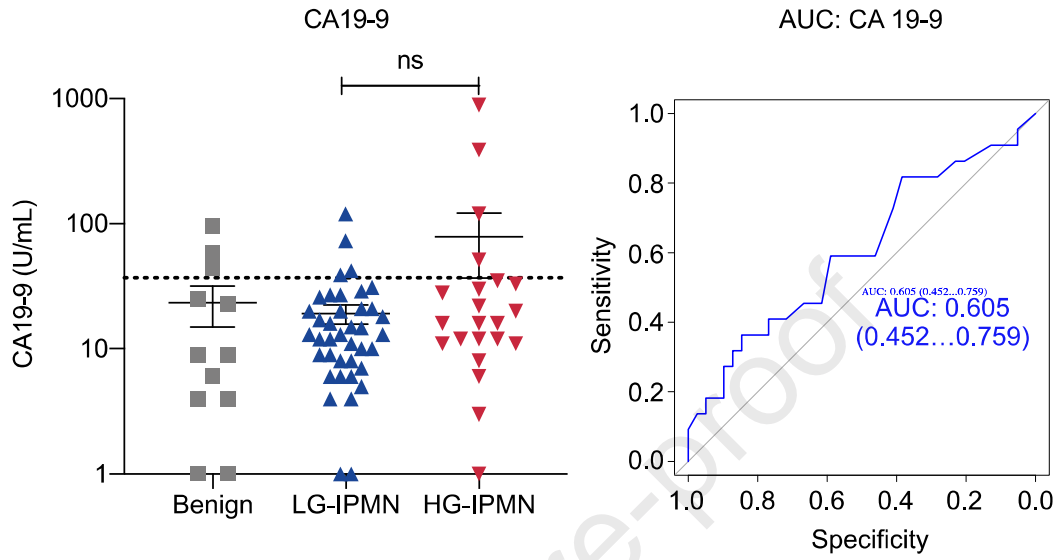

**Table S1. Experimental details of DEST assay.** Each initial plasma EV sample is 1 or 10  $\mu\text{L}$ . Beads are collected using a 96-well plate magnet for each wash step. Each incubation step is done on a plate shaker to maintain beads in suspension. MUC1 and MUC5AC were incubated in HAMA blocker in step 3.

| Step         | Reagent                                | Time (min)         | Vol. ( $\mu\text{L}$ ) | Conc.                                                        | Buffer                                                            |
|--------------|----------------------------------------|--------------------|------------------------|--------------------------------------------------------------|-------------------------------------------------------------------|
| 1            | Blocking                               | 30                 | 100                    | 1.5 $\mu\text{l}$<br>(~1 million) beads/well                 | Antibody dependent, see Table S3                                  |
| 2            | Wash                                   | 4 washes           | 100                    | —                                                            | PBS + 0.1% Tween-20                                               |
| 3            | Incubation with sample                 | 60                 | 100                    | 1-10 $\mu\text{l}$ plasma, 250ng EVs or cell lysate controls | Blocking buffer                                                   |
| 4            | Wash                                   | 4 washes           | 100                    | —                                                            | PBS + 0.1% Tween-20                                               |
| 5            | Detection antibody                     | 60                 | 50                     | 0.5 $\mu\text{g}/\text{mL}$                                  | Blocking buffer                                                   |
| 6            | Wash                                   | 4 washes           | 100                    | —                                                            | PBS + 0.1% Tween-20                                               |
| 7            | Streptavidin-HRP                       | 30                 | 100                    | 137.5ng/mL                                                   | Blocking buffer + 0.1% Tween-20                                   |
| 8            | Wash                                   | 4 washes           | 100                    | —                                                            | PBS + 0.1% Tween-20                                               |
| 9            | Biotin tyramide (signal amplification) | 10                 | 100                    | 5 $\mu\text{g}/\text{mL}$                                    | 0.1M Borate buffer (pH8.5) + 0.003% H <sub>2</sub> O <sub>2</sub> |
| 10           | Wash                                   | 4 washes           | 100                    | —                                                            | PBS + 0.1% Tween-20                                               |
| 11           | Brilliant violet 421 streptavidin      | 30                 | 50                     | 0.5 $\mu\text{g}/\text{mL}$                                  | Blocking buffer                                                   |
| 12           | Wash                                   | 4 washes           | 100                    | —                                                            | PBS + 0.1% Tween-20                                               |
| <b>Total</b> |                                        | <b>220 minutes</b> |                        |                                                              |                                                                   |

**Table S2. List of reagents used in the DEST assay.**

| Reagent                              | Company                  | Catalog #    | Stock conc.   | Final conc.    |
|--------------------------------------|--------------------------|--------------|---------------|----------------|
| Bovine serum albumin                 | Fisher Scientific        | BP1605-100   | —             | 2% w/v         |
| UltraBlock                           | Bio-Rad                  | BUF033C      | —             | use neat       |
| HAMA Blocker                         | Abcam                    | ab193969     | —             | use neat       |
| PBS                                  | Thermo Scientific        | 70011069     | 10X           | 1X             |
| Tween-20                             | Sigma-Aldrich            | P9416-100mL  | 100%          | 0.1%           |
| Pooled normal human plasma (K2 EDTA) | Innovative Research Inc. | IPLA-N       | —             | 1-10 $\mu$ l   |
| Streptavidin-HRP                     | Thermo Scientific        | 21130        | 1.1mg/mL      | 137.5ng/mL     |
| Biotinyl tyramide                    | Sigma-Aldrich            | SML2135-50mg | 2mg/mL (DMSO) | 5 $\mu$ g/mL   |
| Boric Acid                           | Sigma-Aldrich            | B6768-500g   | —             | 0.1M, pH8.5    |
| Hydrogren peroxide solution          | Sigma-Aldrich            | H1009-100mL  | 30%           | 0.003%         |
| Brilliant violet 421 streptavidin    | BioLegend                | 405225       | 0.5mg/mL      | 0.5 $\mu$ g/mL |

**Table S3. Antibodies used in this study.** Polyclonal antibodies are indicated with a \*, all other antibodies are monoclonal. Ms = mouse, rb = rabbit, gt = goat, sh = sheep.

| Target  | Capture antibody |             |         |           |                               | Detection antibody |             |          |          |                                  |
|---------|------------------|-------------|---------|-----------|-------------------------------|--------------------|-------------|----------|----------|----------------------------------|
|         | Vendor           | Cat No.     | Clone   | Species   | Immunogen                     | Vendor             | Cat No.     | Clone    | Species  | Immunogen                        |
| MUC1    | Fitzgerald       | 10-CA15A    | M201211 | ms IgG2b  | Hu CA15-3                     | Fitzgerald         | 10-CA15B    | M2012112 | ms IgG2b | Hu CA15-3                        |
| MUC2    | Sigma            | SAB1412598  | 2A9     | ms IgG2ak | aa 4993-5078 (#NP_002448)     | Novus              | NB120-11197 | 996/1    | ms IgG1  | MUC2 tandem repeat peptide       |
| MUC4    | Sigma            | WH0004585M7 | 5B12    | ms IgG2ak | aa 79-189 (#NP_004523)        | Thermo             | 35-4900     | 1G8      | ms IgG1  | rat ASGP-2                       |
| MUC5AC  | Abcam            | ab24070     | 1-13M1  | ms IgG1   | mucin from ovarian cyst fluid | Thermo             | MA5-12175   | 45M1     | ms IgG1k | M1 mucin from ovarian cyst fluid |
| MUC6    | Novus            | 46760002    |         | rb IgG*   | C-terminus                    | Novus              | 46760002    |          | ms IgG*  | C-terminus                       |
| EPCAM   | R&D              | MAB9601     | 158206  | ms IgG2b  | Recomb. extracell. domain     | R&D                | BAF960      |          | gt IgG*  | aa 24-265 (#CAA32870)            |
| EGFR    | R&D              | AF231       |         | gt IgG*   | aa 25-645 (#CAA25240)         | Abcam              | ab98133     |          | sh IgG*  | 22aa near internal phos. region  |
| GPC1    | R&D              | AF4519      |         | gt IgG*   | aa 24-530 (#P35052)           | Sigma              | SAB2700282  |          | rb IgG*  | aa 200-558 (#P35052)             |
| WNT2    | MyBio Source     | 2104322     |         | rb IgG*   |                               | MyBio Source       | 2104322     |          | rb IgG*  |                                  |
| Das-1   | Millipore        | MABC530     | 7E12H12 | ms IgMk   | Hu colonic protein extract    | Millipore          | MABC530     | 7E12H12  | ms IgMk  | Hu colonic protein extract       |
| STMN1   | Rockland         | 600-401-DG7 |         | rb IgG*   | 20aa peptide near C-term      | Rockland           | 600-401-DG8 |          | rb IgG*  | 17aa peptide near N-term         |
| TSP1    | R&D              | MAB3074     | 301221  | ms IgG2b  | aa 19-1170 (#CAA32889)        | R&D                | BAF3074     |          | gt IgG   | aa 19-1170 (#P07996)             |
| TSP2    | R&D              | MAB16351    | 230927  | ms IgG2a  | aa 19-1172 (#P35442)          | R&D                | BAF1635     |          | gt IgG*  | aa 19-1172 (#P35442)             |
| EphA2   | R&D              | MAB3035     | 371805  | ms IgG2a  | aa 25-534 (#P29317)           | R&D                | BAF3035     |          | gt IgG   | aa 25-534 (#P29317)              |
| S100A4  | MyBio Source     | 2089230     |         | rb IgG    |                               | MyBio Source       | 2089230     |          | rb IgG   |                                  |
| PSCA    | Abcam            | ab64919     |         | rb IgG    | proprietary                   | Fitzgerald         | 70R-19568   |          | rb IgG   | Hu PSCA                          |
| Isotype | Abcam            | ab18400     | MM-30   | ms IgMk   |                               | n/a                | n/a         |          | n/a      |                                  |
|         | Abcam            | ab18415     | MG2a-53 | ms IgG2ak |                               | n/a                | n/a         |          | n/a      |                                  |
|         | R&D              | MAB004      | 20116   | ms IgG2b  |                               | n/a                | n/a         |          | n/a      |                                  |
|         | R&D              | MAB003      | 20102   | ms IgG2a  |                               | n/a                | n/a         |          | n/a      |                                  |
|         | Thermo           | 02-6202     |         | gt IgG    |                               | n/a                | n/a         |          | n/a      |                                  |
|         | Abcam            | ab172730    | EPR25A  | rb IgG    |                               | n/a                | n/a         |          | n/a      |                                  |

**Table S4. DEST antibody pair conditions and controls.** Blocking buffers used for each antibody pair, plasma volume, negative and positive controls. \*Control confirmed for corresponding cell line in the Human Protein Atlas database.

| Target | Blocking   | Vol. plasma | Negative ctrl | Positive ctrl   |
|--------|------------|-------------|---------------|-----------------|
| MUC1   | 2%         | 1µl         | Daudi EV*     | Capan-2 EV*     |
| MUC2   | 2% BSA     | 10µl        | Daudi EV*     | 1966 cell       |
| MUC4   | 2% BSA     | 10µl        | Daudi EV*     | 1966 cell       |
| MUC5AC | UltraBlock | 10µl        | 1617 EV       | 1505 EV         |
| MUC6   | 2% BSA     | 10µl        | Daudi EV*     | 1966 cell       |
| EpCAM  | 2% BSA     | 10µl        | Daudi EV*     | 1617 EV         |
| EGFR   | 2% BSA     | 10µl        | Daudi EV*     | BxPC3 cell      |
| GPC1   | 2% BSA     | 1µl         | Daudi EV*     | GPC1 protein    |
| WNT2   | 2% BSA     | 1µl         | Daudi EV*     | WNT2 protein    |
| Das-1  | UltraBlock | 10µl        | 1617 EV       | LS180 EV        |
| STMN1  | 2% BSA     | 10µl        | 1617 EV       | Mia PaCa-2 cell |
| TSP1   | UltraBlock | 1µl         | Daudi EV*     | TSP1 protein    |
| TSP2   | 2% BSA     | 1µl         | 1617 EV       | TSP2 protein    |
| EphA2  | 2% BSA     | 10µl        | Daudi EV*     | A549 EV*        |
| S100A4 | 2% BSA     | 10µl        | Daudi EV*     | S100A4 protein  |
| PSCA   | 2% BSA     | 10µl        | Daudi EV*     | PSCA protein    |

**Table S5. Additional antibodies tested, but found to be unsuitable for DEST.**

| Target | Alternative antibodies tested                                                   |
|--------|---------------------------------------------------------------------------------|
|        | Vendor (Cat No.)                                                                |
| MUC1   | Fitzgerald (10-M93A), BioLegend (355602)                                        |
| MUC2   | Antibodies-online (ABIN1173448), Novus (H000-4583-M02, NBP2-25221)              |
| MUC5AC | Novus (NBP2-44452, NBP2-15196, H00004586-M07, NBP2-44458)                       |
| MUC6   | Origene (TA322537), Novus (NBP2-44376)                                          |
| EGFR   | Sino Biological Inc. (10001-RE11, 10001-R021), R&D (BAF231)                     |
| EpCAM  | BioLegend (324215), Thermo (710524), Abcam (ab20160)                            |
| WNT2   | R&D (AF3464), Novus (2295002), Santa Cruz (sc-514382)                           |
| PSCA   | Fitzgerald (70R-19568), Novus (H00008000-M02)                                   |
| TSP1   | Thermo (MA5-13395)                                                              |
| MUC13  | Sigma (SAB4502427), Fitzgerald (70R-32134)                                      |
| ZEB1   | Origene (TA590279), Novus (NBP2-37329)                                          |
| PLEC1  | Abcam (ab32528), Santa Cruz (sc-33649), Origene (TA351536), Millipore (MAB5674) |
| HOOK1  | Novus (H00051361-AP21, antibody pair)                                           |
| PTPN6  | Novus (H00005777-AP22, antibody pair)                                           |
| FBN1   | Millipore (MAB2499, MAB2502)                                                    |

**Table S6. EV biomarker analysis in validation cohort.** All numbers for sensitivity (sens), specificity (spec), F1 score and positive predictive value (PPV) are in fractions and are compared to LG-IPMN. 95% confidence intervals of this small series are shown in parentheses.

| Biomarker(s)      | Invasive HG-IPMN     |                      |      |      | Noninvasive HG-IPMN  |                      |      |      | Combined HG-IPMN     |                      |      |      |
|-------------------|----------------------|----------------------|------|------|----------------------|----------------------|------|------|----------------------|----------------------|------|------|
|                   | Sens                 | Spec                 | F1   | PPV  | Sens                 | Spec                 | F1   | PPV  | Sens                 | Spec                 | F1   | PPV  |
| MUC5AC            | 1.00<br>(1.00, 1.00) | 1.00<br>(1.00, 1.00) | 1.00 | 1.00 | 0.11<br>(0.00, 0.33) | 1.0<br>(1.00, 1.00)  | 0.20 | 1.00 | 0.33<br>(0.08, 0.58) | 0.97<br>(0.91, 1.00) | 0.47 | 0.80 |
| Imaging alone     | 0.33<br>(0.00, 1.00) | 0.94<br>(0.86, 1.00) | 0.33 | 0.33 | 0.67<br>(0.33, 0.89) | 0.94<br>(0.86, 1.00) | 0.71 | 0.75 | 0.58<br>(0.33, 0.83) | 0.94<br>(0.86, 1.00) | 0.67 | 0.80 |
| DEST +<br>Imaging | 1.00<br>(1.00, 1.00) | 0.94<br>(0/86, 1.00) | 1.00 | 0.60 | 0.67<br>(0.33, 0.89) | 0.89<br>(0.77, 0.97) | 0.63 | 0.60 | 0.75<br>(0.50, 1.00) | 0.89<br>(0.77, 0.97) | 0.72 | 0.69 |



## REFERENCES

1. Pergolini, I, Morales-Oyarvide, V, Mino-Kenudson, M et al. Tumor engraftment in patient-derived xenografts of pancreatic ductal adenocarcinoma is associated with adverse clinicopathological features and poor survival. PLoS One. 2017;12:e0182855.

Journal Pre-proof
